# Supplementary material for: Group V Phospholipase A2 Mediates Endothelial Dysfunction and Acute Lung Injury Caused by Methicillin-Resistant Staphylococcus Aureus
Source: MDPI journal article supplement (doi:10.3390/cells10071731), 2021-07-08
Supplement: s1 [file s1]

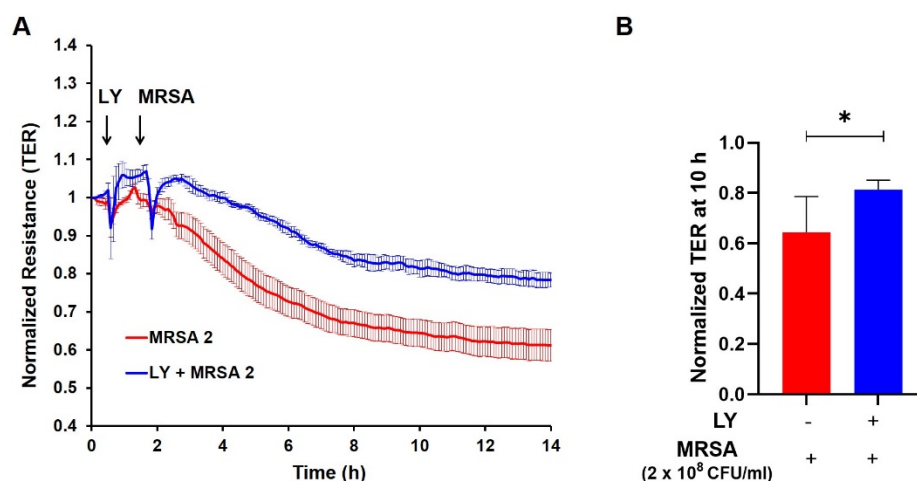

**Supplementary Figure S1. sPLA<sub>2</sub> inhibitor, LY311727, attenuates HK-MRSA-induced lung endothelial barrier disruption.** HPAEC were pre-treated with LY311727 (100  $\mu$ M, 1 hour) and challenged with HK-MRSA (2x 10<sup>8</sup> CFU/ml). (A): Transendothelial electrical resistance (TER) values were recorded over time. (B): Normalized TER values at the 10-hour time point. \*p < 0.05. N=4-17/condition.

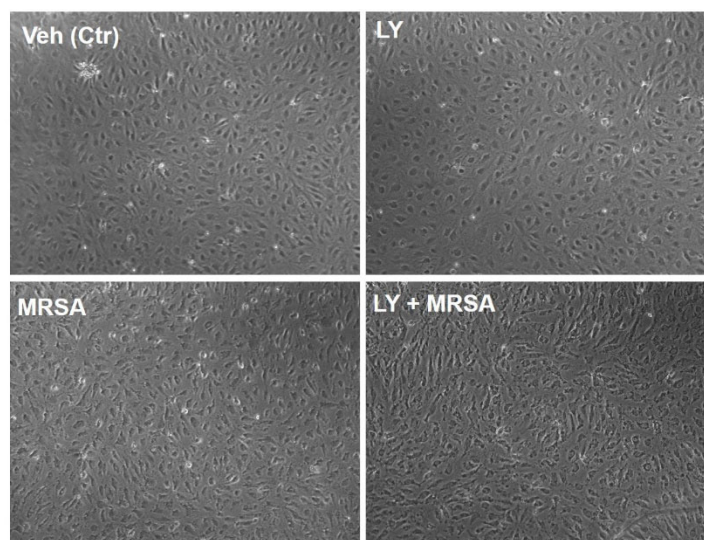

**Supplementary Figure S2. XPerT Assay: Brightfield images of cell monolayers.** HLMVEC monolayers were grown to confluency on biotinylated gelatin coated plates. Cells were pretreated with LY311727 (100  $\mu$ M, 1 hour) and then challenged with HK-MRSA (2x 10<sup>8</sup> CFU/ml) for 8 hours. FITC-avidin was added to media and allowed to permeate cells to reach biotin substrate at site of paracellular gaps. Images were taken using a fluorescence microscope as shown in Figure 3. Depicted are the corresponding brightfield images (10x).



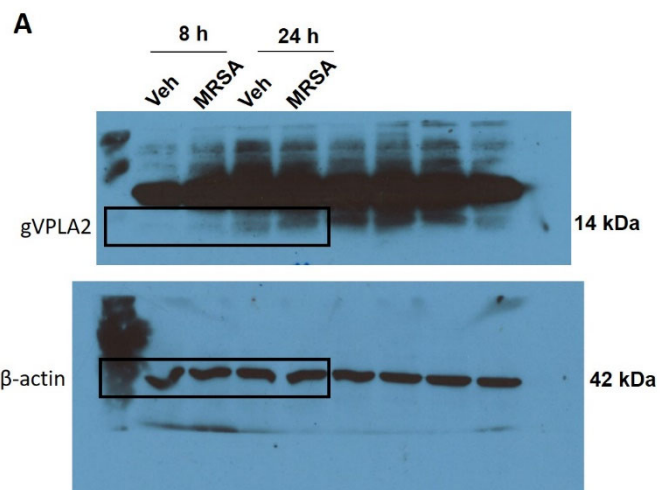

Unedited blots shown in figure 1C

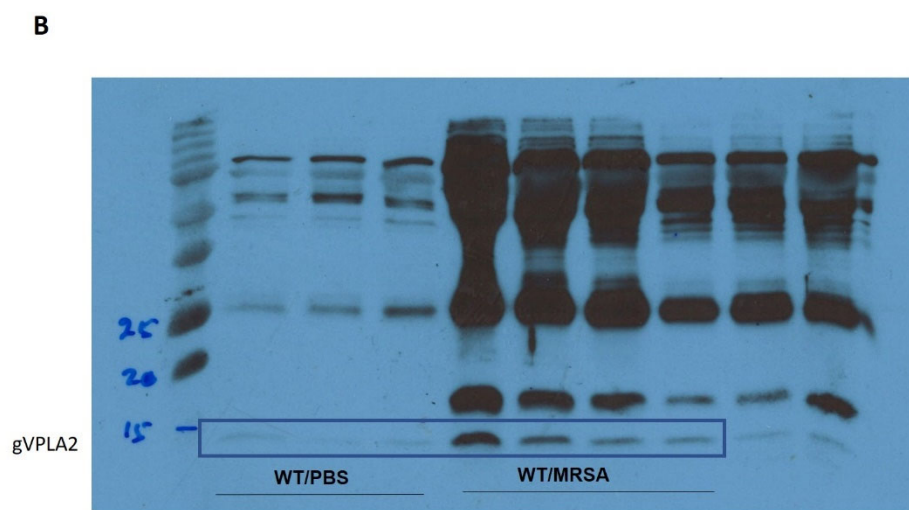

Unedited blot shown in figure 6D

**Supplementary Figure S3.** Unedited blots for Figure 1C and Figure 6D for shown.
